# Supplementary material
Source: PubMed Central journal article supplement (PMC2708756)
Supplement: 0900746106_ST1_PDF.pdf [file 0900746106_ST1_PDF.pdf]

**Table S1: Propensity scores of amino acids at different positions on the peptide**

| Residue | Position 4 | Position 5 | Position 6 | Position 7 |
|---------|------------|------------|------------|------------|
| A       | 0.01864    | 0.01592    | 0.00816    | 0.03534    |
| C       | 0.01049    | 0.00233    | 0.00544    | 0          |
| D       | 0.00777    | 0.00078    | 0.00466    | 0.02641    |
| E       | 0.03650    | 0.03495    | 0.10330    | 0.10874    |
| F       | 0.00155    | 0.03223    | 0.00350    | 0.12583    |
| G       | 0.01126    | 0.00388    | 0.00311    | 0.02369    |
| H       | 0.02913    | 0.26175    | 0.01786    | 0.08000    |
| I       | 0.06252    | 0.11883    | 0.17243    | 0          |
| K       | 0.04971    | 0.06369    | 0.01204    | 0.03689    |
| L       | 0.13786    | 0.02524    | 0.12777    | 0.07223    |
| M       | 0.04738    | 0.08816    | 0.18019    | 0          |
| N       | 0.02447    | 0.0365     | 0.05864    | 0.03301    |
| P       | 0          | 0.07184    | 0          | 0          |
| Q       | 0.02718    | 0.01087    | 0.08155    | 0.04388    |
| R       | 0.03417    | 0.08039    | 0.01087    | 0.03262    |
| S       | 0.01709    | 0.00699    | 0.00350    | 0.02951    |
| T       | 0.04272    | 0.02058    | 0.01476    | 0.02835    |
| V       | 0.05204    | 0.05282    | 0.15107    | 0          |
| W       | 0.00932    | 0.06990    | 0.03146    | 0          |
| Y       | 0.38019    | 0.00233    | 0.00971    | 0.32350    |

Propensities were computed on a set of 2,575 heptapeptides that showed a binding affinity to Ydj1, which is comparable to that of wild-type peptide GWLYEIS. The sum of propensity values at each position is equal to 1.
