# Supplementary material
Source: PubMed Central journal article supplement (PMC2708756)
Supplement: 0900746106_ST2_PDF.pdf [file 0900746106_ST2_PDF.pdf]

**Table S2: Affinity scores for peptide-binding to Ydj1 (computed using Medusa)**

| Name  | S no.   | W no.    | Sequence                   | $\Delta G_{\text{Complex}}$ | $\Delta G_{\text{Ydj1}}$ | $\Delta G_{\text{Peptide}}$ | $\Delta\Delta G_{\text{binding}}$ |
|-------|---------|----------|----------------------------|-----------------------------|--------------------------|-----------------------------|-----------------------------------|
| PolyQ | 1       |          | DDQQQQQQQQQQQQQQQQKK       |                             |                          |                             |                                   |
|       |         | 0        | DDQQQQQ                    | -129.526                    | -128.526                 | 4.942                       | -5.942                            |
|       |         | 1        | DQQQQQQ                    | -126.920                    | -125.920                 | 7.704                       | -8.704                            |
|       |         | 2        | QQQQQQQ                    | -125.101                    | -124.101                 | 10.968                      | -11.968                           |
|       |         | 3        | QQQQQQQ                    | -125.101                    | -124.101                 | 10.968                      | -11.968                           |
|       |         | 4        | QQQQQQQ                    | -125.101                    | -124.101                 | 10.968                      | -11.968                           |
|       |         | 5        | QQQQQQQ                    | -125.101                    | -124.101                 | 10.968                      | -11.968                           |
|       |         | 6        | QQQQQQQ                    | -125.101                    | -124.101                 | 10.968                      | -11.968                           |
|       |         | 7        | QQQQQQQ                    | -125.101                    | -124.101                 | 10.968                      | -11.968                           |
|       |         | 8        | QQQQQQQ                    | -125.101                    | -124.101                 | 10.968                      | -11.968                           |
|       |         | 9        | QQQQQQQ                    | -125.101                    | -124.101                 | 10.968                      | -11.968                           |
|       |         | 10       | QQQQQQQ                    | -125.101                    | -124.101                 | 10.968                      | -11.968                           |
|       |         | 11       | QQQQQQK                    | -125.221                    | -124.221                 | 9.459                       | -10.459                           |
| 12    | QQQQQKK | -126.298 | -125.298                   | 8.363                       | -9.363                   |                             |                                   |
| Rnq1  | 1       |          | KKNSNNSQQGYNQS YQNGNQNSQKK |                             |                          |                             |                                   |
|       |         | 0        | KKNSNNS                    | -122.115                    | -121.115                 | 4.826                       | -5.826                            |
|       |         | 1        | KNSNNSQ                    | -127.581                    | -126.581                 | 4.812                       | -5.812                            |
|       |         | 2        | NSNNSQQ                    | -123.122                    | -122.122                 | 8.938                       | -9.938                            |
|       |         | 3        | SNNSQQG                    | -132.409                    | -131.409                 | 3.859                       | -4.859                            |
|       |         | 4        | NNSQQGY                    | -127.996                    | -126.996                 | 10.391                      | -11.391                           |
|       |         | 5        | NSQQGYN                    | -125.889                    | -124.889                 | 9.147                       | -10.147                           |
|       |         | 6        | SQQGYNQ                    | -132.234                    | -131.234                 | 9.732                       | -10.732                           |
|       |         | 7        | QQGYNQS                    | -127.328                    | -126.328                 | 10.385                      | -11.385                           |
|       |         | 8        | QGYNQS Y                   | -92.772                     | -91.772                  | 11.674                      | -12.674                           |
|       |         | 9        | GYNQS YQ                   | -127.951                    | -126.951                 | 13.168                      | -14.168                           |
|       |         | 10       | YNQS YQN                   | -99.384                     | -98.384                  | 9.530                       | -10.530                           |
|       |         | 11       | NQS YQNG                   | -133.006                    | -132.006                 | 6.766                       | -7.766                            |
|       |         | 12       | QS YQNGN                   | -93.614                     | -92.614                  | 9.404                       | -10.404                           |
|       |         | 13       | SYQNGNQ                    | -136.198                    | -135.198                 | 9.280                       | -10.280                           |
|       |         | 14       | YQNGNQN                    | -104.029                    | -103.029                 | 8.325                       | -9.325                            |
|       |         | 15       | QNGNQNS                    | -129.778                    | -128.778                 | 4.655                       | -5.655                            |
|       |         | 16       | NGNQNSQ                    | -121.415                    | -120.415                 | 7.825                       | -8.825                            |
|       |         | 17       | GNQNSQK                    | -143.237                    | -142.237                 | 8.472                       | -9.472                            |
| 18    | NQNSQKK | -123.912 | -122.912                   | 6.551                       | -7.551                   |                             |                                   |
| Prion | 1       |          | ASMASFMSNNNQNSNNSQQGYNQ    |                             |                          |                             |                                   |
|       |         | 0        | ASMASF                     | -137.253                    | -136.253                 | 9.283                       | -10.283                           |
|       |         | 1        | SMASFMS                    | -134.015                    | -133.015                 | 10.166                      | -11.166                           |
|       |         | 2        | MASSFMS                    | -123.722                    | -122.722                 | 12.059                      | -13.059                           |
|       |         | 3        | ASSFMS                     | -136.750                    | -135.750                 | 8.454                       | -9.454                            |
|       |         | 4        | SSFMSN                     | -117.169                    | -116.169                 | 9.935                       | -10.935                           |
| 5     | SFMSN   | -136.205 | -135.205                   | 11.215                      | -12.215                  |                             |                                   |

|    |                           |          |          |        |         |
|----|---------------------------|----------|----------|--------|---------|
| 6  | FMHSNNN                   | -107.656 | -106.656 | 11.961 | -12.961 |
| 7  | MHSNNNQ                   | -125.993 | -124.993 | 10.048 | -11.048 |
| 8  | HSNNNQN                   | -124.541 | -123.541 | 6.992  | -7.992  |
| 9  | SNNNQNS                   | -130.896 | -129.896 | 4.391  | -5.391  |
| 10 | NNNQNSN                   | -123.838 | -122.838 | 7.011  | -8.011  |
| 11 | NNQNSNN                   | -128.849 | -127.849 | 6.637  | -7.637  |
| 12 | NQNSNNS                   | -124.937 | -123.937 | 7.172  | -8.172  |
| 13 | QNSNNSQ                   | -130.216 | -129.216 | 6.729  | -7.729  |
| 14 | NSNNSQQ                   | -123.122 | -122.122 | 8.938  | -9.938  |
| 15 | SNNSQQG                   | -132.409 | -131.409 | 3.859  | -4.859  |
| 16 | NNSQQGY                   | -127.996 | -126.996 | 10.391 | -11.391 |
| 17 | NSQQGYN                   | -125.889 | -124.889 | 9.147  | -10.147 |
| 18 | SQQGYNQ                   | -132.234 | -131.234 | 9.732  | -10.732 |
| 2  | ASSFMHSNNNQNSNNSQQGYNQSYQ |          |          |        |         |
| 0  | ASSFMHS                   | -136.750 | -135.750 | 8.454  | -9.454  |
| 1  | SSFMHSN                   | -117.169 | -116.169 | 9.935  | -10.935 |
| 2  | SFMHSNN                   | -136.205 | -135.205 | 11.215 | -12.215 |
| 3  | FMHSNNN                   | -107.656 | -106.656 | 11.961 | -12.961 |
| 4  | MHSNNNQ                   | -125.993 | -124.993 | 10.048 | -11.048 |
| 5  | HSNNNQN                   | -124.541 | -123.541 | 6.992  | -7.992  |
| 6  | SNNNQNS                   | -130.896 | -129.896 | 4.391  | -5.391  |
| 7  | NNNQNSN                   | -123.838 | -122.838 | 7.011  | -8.011  |
| 8  | NNQNSNN                   | -128.849 | -127.849 | 6.637  | -7.637  |
| 9  | NQNSNNS                   | -124.937 | -123.937 | 7.172  | -8.172  |
| 10 | QNSNNSQ                   | -130.216 | -129.216 | 6.729  | -7.729  |
| 11 | NSNNSQQ                   | -123.122 | -122.122 | 8.938  | -9.938  |
| 12 | SNNSQQG                   | -132.409 | -131.409 | 3.859  | -4.859  |
| 13 | NNSQQGY                   | -127.996 | -126.996 | 10.391 | -11.391 |
| 14 | NSQQGYN                   | -125.889 | -124.889 | 9.147  | -10.147 |
| 15 | SQQGYNQ                   | -132.234 | -131.234 | 9.732  | -10.732 |
| 16 | QQGYNQS                   | -127.328 | -126.328 | 10.385 | -11.385 |
| 17 | QGYNQSY                   | -92.772  | -91.772  | 11.674 | -12.674 |
| 18 | GYNQSYQ                   | -127.951 | -126.951 | 13.168 | -14.168 |
| 3  | FMHSNNNQNSNNSQQGYNQSYQNGN |          |          |        |         |
| 0  | FMHSNNN                   | -107.656 | -106.656 | 11.961 | -12.961 |
| 1  | MHSNNNQ                   | -125.993 | -124.993 | 10.048 | -11.048 |
| 2  | HSNNNQN                   | -124.541 | -123.541 | 6.992  | -7.992  |
| 3  | SNNNQNS                   | -130.896 | -129.896 | 4.391  | -5.391  |
| 4  | NNNQNSN                   | -123.838 | -122.838 | 7.011  | -8.011  |
| 5  | NNQNSNN                   | -128.849 | -127.849 | 6.637  | -7.637  |
| 6  | NQNSNNS                   | -124.937 | -123.937 | 7.172  | -8.172  |
| 7  | QNSNNSQ                   | -130.216 | -129.216 | 6.729  | -7.729  |
| 8  | NSNNSQQ                   | -123.122 | -122.122 | 8.938  | -9.938  |
| 9  | SNNSQQG                   | -132.409 | -131.409 | 3.859  | -4.859  |
| 10 | NNSQQGY                   | -127.996 | -126.996 | 10.391 | -11.391 |

|    |         |          |          |        |         |
|----|---------|----------|----------|--------|---------|
| 11 | NSQQGYN | -125.889 | -124.889 | 9.147  | -10.147 |
| 12 | SQQGYNQ | -132.234 | -131.234 | 9.732  | -10.732 |
| 13 | QGGYNQS | -127.328 | -126.328 | 10.385 | -11.385 |
| 14 | QGYNQSY | -92.772  | -91.772  | 11.674 | -12.674 |
| 15 | GYNQSYQ | -127.951 | -126.951 | 13.168 | -14.168 |
| 16 | YNQSYQN | -99.384  | -98.384  | 9.530  | -10.530 |
| 17 | NQSYQNG | -133.006 | -132.006 | 6.766  | -7.766  |
| 18 | QSYQNGN | -93.614  | -92.614  | 9.404  | -10.404 |

4 GYNQSYQNGNQNSQGYNNQQYQGGN

|    |         |          |          |        |         |
|----|---------|----------|----------|--------|---------|
| 0  | GYNQSYQ | -127.951 | -126.951 | 13.168 | -14.168 |
| 1  | YNQSYQN | -99.384  | -98.384  | 9.530  | -10.530 |
| 2  | NQSYQNG | -133.006 | -132.006 | 6.766  | -7.766  |
| 3  | QSYQNGN | -93.614  | -92.614  | 9.404  | -10.404 |
| 4  | SYQNGNQ | -136.198 | -135.198 | 9.280  | -10.280 |
| 5  | YQNGNQN | -104.029 | -103.029 | 8.325  | -9.325  |
| 6  | QNGNQNS | -129.778 | -128.778 | 4.655  | -5.655  |
| 7  | NGNQNSQ | -121.415 | -120.415 | 7.825  | -8.825  |
| 8  | GNQNSQG | -145.590 | -144.590 | 6.081  | -7.081  |
| 9  | NQNSQGY | -121.087 | -120.087 | 11.413 | -12.413 |
| 10 | QNSQGYN | -125.939 | -124.939 | 9.774  | -10.774 |
| 11 | NSQGYNN | -124.869 | -123.869 | 8.282  | -9.282  |
| 12 | SQGYNNQ | -134.900 | -133.900 | 10.099 | -11.099 |
| 13 | QGYNNQQ | -93.153  | -92.153  | 11.514 | -12.514 |
| 14 | GYNNQQY | -133.352 | -132.352 | 11.771 | -12.771 |
| 15 | YNNQQYQ | -100.080 | -99.080  | 11.831 | -12.831 |
| 16 | NNQQYQG | -128.796 | -127.796 | 7.806  | -8.806  |
| 17 | NQQYQGG | -128.986 | -127.986 | 6.723  | -7.723  |
| 18 | QQYQGGN | -91.741  | -90.741  | 10.516 | -11.516 |

5 QSYQNGNQNSQGYNNQQYQGGNGGY

|    |         |          |          |        |         |
|----|---------|----------|----------|--------|---------|
| 0  | QSYQNGN | -93.614  | -92.614  | 9.404  | -10.404 |
| 1  | SYQNGNQ | -136.198 | -135.198 | 9.280  | -10.280 |
| 2  | YQNGNQN | -104.029 | -103.029 | 8.325  | -9.325  |
| 3  | QNGNQNS | -129.778 | -128.778 | 4.655  | -5.655  |
| 4  | NGNQNSQ | -121.415 | -120.415 | 7.825  | -8.825  |
| 5  | GNQNSQG | -145.590 | -144.590 | 6.081  | -7.081  |
| 6  | NQNSQGY | -121.087 | -120.087 | 11.413 | -12.413 |
| 7  | QNSQGYN | -125.939 | -124.939 | 9.774  | -10.774 |
| 8  | NSQGYNN | -124.869 | -123.869 | 8.282  | -9.282  |
| 9  | SQGYNNQ | -134.900 | -133.900 | 10.099 | -11.099 |
| 10 | QGYNNQQ | -93.153  | -92.153  | 11.514 | -12.514 |
| 11 | GYNNQQY | -133.352 | -132.352 | 11.771 | -12.771 |
| 12 | YNNQQYQ | -100.080 | -99.080  | 11.831 | -12.831 |
| 13 | NNQQYQG | -128.796 | -127.796 | 7.806  | -8.806  |
| 14 | NQQYQGG | -128.986 | -127.986 | 6.723  | -7.723  |

|    |                           |          |          |        |         |
|----|---------------------------|----------|----------|--------|---------|
| 15 | QQYQGGN                   | -91.741  | -90.741  | 10.516 | -11.516 |
| 16 | QYQGGNG                   | -126.886 | -125.886 | 9.203  | -10.203 |
| 17 | YQGGNGG                   | -105.828 | -104.828 | 7.343  | -8.343  |
| 18 | QGGNGGY                   | -123.580 | -122.580 | 10.805 | -11.805 |
| 6  | QNGNQNSQGYNNQQYQGGNGGYQQQ |          |          |        |         |
| 0  | QNGNQNS                   | -129.778 | -128.778 | 4.655  | -5.655  |
| 1  | NGNQNSQ                   | -121.415 | -120.415 | 7.825  | -8.825  |
| 2  | GNQNSQG                   | -145.590 | -144.590 | 6.081  | -7.081  |
| 3  | NQNSQGY                   | -121.087 | -120.087 | 11.413 | -12.413 |
| 4  | QNSQGYN                   | -125.939 | -124.939 | 9.774  | -10.774 |
| 5  | NSQGYNN                   | -124.869 | -123.869 | 8.282  | -9.282  |
| 6  | SQGYNNQ                   | -134.900 | -133.900 | 10.099 | -11.099 |
| 7  | QGYNNQQ                   | -93.153  | -92.153  | 11.514 | -12.514 |
| 8  | GYNNQQY                   | -133.352 | -132.352 | 11.771 | -12.771 |
| 9  | YNNQQYQ                   | -100.080 | -99.080  | 11.831 | -12.831 |
| 10 | NNQQYQG                   | -128.796 | -127.796 | 7.806  | -8.806  |
| 11 | NQQYQGG                   | -128.986 | -127.986 | 6.723  | -7.723  |
| 12 | QQYQGGN                   | -91.741  | -90.741  | 10.516 | -11.516 |
| 13 | QYQGGNG                   | -126.886 | -125.886 | 9.203  | -10.203 |
| 14 | YQGGNGG                   | -105.828 | -104.828 | 7.343  | -8.343  |
| 15 | QGGNGGY                   | -123.580 | -122.580 | 10.805 | -11.805 |
| 16 | GGNGGYQ                   | -129.096 | -128.096 | 10.688 | -11.688 |
| 17 | GNGGYQQ                   | -136.830 | -135.830 | 9.871  | -10.871 |
| 18 | NGGYQQQ                   | -128.269 | -127.269 | 9.454  | -10.454 |
| 7  | NQNSQGYNNQQYQGGNGGYQQQQGQ |          |          |        |         |
| 0  | NQNSQGY                   | -121.087 | -120.087 | 11.413 | -12.413 |
| 1  | QNSQGYN                   | -125.939 | -124.939 | 9.774  | -10.774 |
| 2  | NSQGYNN                   | -124.869 | -123.869 | 8.282  | -9.282  |
| 3  | SQGYNNQ                   | -134.900 | -133.900 | 10.099 | -11.099 |
| 4  | QGYNNQQ                   | -93.153  | -92.153  | 11.514 | -12.514 |
| 5  | GYNNQQY                   | -133.352 | -132.352 | 11.771 | -12.771 |
| 6  | YNNQQYQ                   | -100.080 | -99.080  | 11.831 | -12.831 |
| 7  | NNQQYQG                   | -128.796 | -127.796 | 7.806  | -8.806  |
| 8  | NQQYQGG                   | -128.986 | -127.986 | 6.723  | -7.723  |
| 9  | QQYQGGN                   | -91.741  | -90.741  | 10.516 | -11.516 |
| 10 | QYQGGNG                   | -126.886 | -125.886 | 9.203  | -10.203 |
| 11 | YQGGNGG                   | -105.828 | -104.828 | 7.343  | -8.343  |
| 12 | QGGNGGY                   | -123.580 | -122.580 | 10.805 | -11.805 |
| 13 | GGNGGYQ                   | -129.096 | -128.096 | 10.688 | -11.688 |
| 14 | GNGGYQQ                   | -136.830 | -135.830 | 9.871  | -10.871 |
| 15 | NGGYQQQ                   | -128.269 | -127.269 | 9.454  | -10.454 |
| 16 | GGYQQQQ                   | -109.489 | -108.489 | 9.906  | -10.906 |
| 17 | GYQQQQG                   | -143.865 | -142.865 | 8.135  | -9.135  |
| 18 | YQQQQGQ                   | -97.305  | -96.305  | 11.766 | -12.766 |
| 8  | YNNQQYQGGNGGYQQQQGQSGGAFS |          |          |        |         |

|    |                           |          |          |        |         |
|----|---------------------------|----------|----------|--------|---------|
| 0  | YNNQQYQ                   | -100.080 | -99.080  | 11.831 | -12.831 |
| 1  | NNQQYQG                   | -128.796 | -127.796 | 7.806  | -8.806  |
| 2  | NQQYQGG                   | -128.986 | -127.986 | 6.723  | -7.723  |
| 3  | QQYQGGN                   | -91.741  | -90.741  | 10.516 | -11.516 |
| 4  | QYQGGNG                   | -126.886 | -125.886 | 9.203  | -10.203 |
| 5  | YQGGNGG                   | -105.828 | -104.828 | 7.343  | -8.343  |
| 6  | QGGNGGY                   | -123.580 | -122.580 | 10.805 | -11.805 |
| 7  | GGNGGYQ                   | -129.096 | -128.096 | 10.688 | -11.688 |
| 8  | GNGGYQQ                   | -136.830 | -135.830 | 9.871  | -10.871 |
| 9  | NGGYQQQ                   | -128.269 | -127.269 | 9.454  | -10.454 |
| 10 | GGYQQQQ                   | -109.489 | -108.489 | 9.906  | -10.906 |
| 11 | GYQQQQG                   | -143.865 | -142.865 | 8.135  | -9.135  |
| 12 | YQQQQQG                   | -97.305  | -96.305  | 11.766 | -12.766 |
| 13 | QQQQGQS                   | -125.598 | -124.598 | 10.082 | -11.082 |
| 14 | QQQGQSG                   | -127.229 | -126.229 | 6.358  | -7.358  |
| 15 | QQGQSGG                   | -128.012 | -127.012 | 5.419  | -6.419  |
| 16 | QGQSGGA                   | -124.443 | -123.443 | 8.505  | -9.505  |
| 17 | GQSGGAF                   | -137.919 | -136.919 | 9.679  | -10.679 |
| 18 | QSGGAFS                   | -125.286 | -124.286 | 8.696  | -9.696  |
| 9  | QQYQGGNGGYQQQQGQSGGAFSSLA |          |          |        |         |
| 0  | QQYQGGN                   | -91.741  | -90.741  | 10.516 | -11.516 |
| 1  | QYQGGNG                   | -126.886 | -125.886 | 9.203  | -10.203 |
| 2  | YQGGNGG                   | -105.828 | -104.828 | 7.343  | -8.343  |
| 3  | QGGNGGY                   | -123.580 | -122.580 | 10.805 | -11.805 |
| 4  | GGNGGYQ                   | -129.096 | -128.096 | 10.688 | -11.688 |
| 5  | GNGGYQQ                   | -136.830 | -135.830 | 9.871  | -10.871 |
| 6  | NGGYQQQ                   | -128.269 | -127.269 | 9.454  | -10.454 |
| 7  | GGYQQQQ                   | -109.489 | -108.489 | 9.906  | -10.906 |
| 8  | GYQQQQG                   | -143.865 | -142.865 | 8.135  | -9.135  |
| 9  | YQQQQQG                   | -97.305  | -96.305  | 11.766 | -12.766 |
| 10 | QQQQGQS                   | -125.598 | -124.598 | 10.082 | -11.082 |
| 11 | QQQGQSG                   | -127.229 | -126.229 | 6.358  | -7.358  |
| 12 | QQGQSGG                   | -128.012 | -127.012 | 5.419  | -6.419  |
| 13 | QGQSGGA                   | -124.443 | -123.443 | 8.505  | -9.505  |
| 14 | GQSGGAF                   | -137.919 | -136.919 | 9.679  | -10.679 |
| 15 | QSGGAFS                   | -125.286 | -124.286 | 8.696  | -9.696  |
| 16 | SGGAFSS                   | -139.552 | -138.552 | 6.304  | -7.304  |
| 17 | GGAFFSL                   | -136.007 | -135.007 | 9.513  | -10.513 |
| 18 | GAFSSLA                   | -120.949 | -119.949 | 8.461  | -9.461  |
| 10 | QGGNGGYQQQQGQSGGAFSSLASMA |          |          |        |         |
| 0  | QGGNGGY                   | -123.580 | -122.580 | 10.805 | -11.805 |
| 1  | GGNGGYQ                   | -129.096 | -128.096 | 10.688 | -11.688 |
| 2  | GNGGYQQ                   | -136.830 | -135.830 | 9.871  | -10.871 |
| 3  | NGGYQQQ                   | -128.269 | -127.269 | 9.454  | -10.454 |
| 4  | GGYQQQQ                   | -109.489 | -108.489 | 9.906  | -10.906 |

|    |                            |          |          |        |         |
|----|----------------------------|----------|----------|--------|---------|
| 5  | GYQQQQG                    | -143.865 | -142.865 | 8.135  | -9.135  |
| 6  | YQQQQQG                    | -97.305  | -96.305  | 11.766 | -12.766 |
| 7  | QQQQGQS                    | -125.598 | -124.598 | 10.082 | -11.082 |
| 8  | QQQGQSG                    | -127.229 | -126.229 | 6.358  | -7.358  |
| 9  | QQGQSGG                    | -128.012 | -127.012 | 5.419  | -6.419  |
| 10 | QGQSGGA                    | -124.443 | -123.443 | 8.505  | -9.505  |
| 11 | GQSGGAF                    | -137.919 | -136.919 | 9.679  | -10.679 |
| 12 | QSGGAFS                    | -125.286 | -124.286 | 8.696  | -9.696  |
| 13 | SGGAFSS                    | -139.552 | -138.552 | 6.304  | -7.304  |
| 14 | GGAFSSL                    | -136.007 | -135.007 | 9.513  | -10.513 |
| 15 | GAFSSLA                    | -120.949 | -119.949 | 8.461  | -9.461  |
| 16 | AFSSLAS                    | -136.520 | -135.520 | 8.004  | -9.004  |
| 17 | FSSLASM                    | -115.353 | -114.353 | 7.252  | -8.252  |
| 18 | SSLASMA                    | -141.178 | -140.178 | 7.914  | -8.914  |
| 11 | NGGYQQQQGQSGGAFSSLASMAQSY  |          |          |        |         |
| 0  | NGGYQQQ                    | -128.269 | -127.269 | 9.454  | -10.454 |
| 1  | GGYQQQQ                    | -109.489 | -108.489 | 9.906  | -10.906 |
| 2  | GYQQQQG                    | -143.865 | -142.865 | 8.135  | -9.135  |
| 3  | YQQQQQG                    | -97.305  | -96.305  | 11.766 | -12.766 |
| 4  | QQQQGQS                    | -125.598 | -124.598 | 10.082 | -11.082 |
| 5  | QQQGQSG                    | -127.229 | -126.229 | 6.358  | -7.358  |
| 6  | QQGQSGG                    | -128.012 | -127.012 | 5.419  | -6.419  |
| 7  | QGQSGGA                    | -124.443 | -123.443 | 8.505  | -9.505  |
| 8  | GQSGGAF                    | -137.919 | -136.919 | 9.679  | -10.679 |
| 9  | QSGGAFS                    | -125.286 | -124.286 | 8.696  | -9.696  |
| 10 | SGGAFSS                    | -139.552 | -138.552 | 6.304  | -7.304  |
| 11 | GGAFSSL                    | -136.007 | -135.007 | 9.513  | -10.513 |
| 12 | GAFSSLA                    | -120.949 | -119.949 | 8.461  | -9.461  |
| 13 | AFSSLAS                    | -136.520 | -135.520 | 8.004  | -9.004  |
| 14 | FSSLASM                    | -115.353 | -114.353 | 7.252  | -8.252  |
| 15 | SSLASMA                    | -141.178 | -140.178 | 7.914  | -8.914  |
| 16 | SLASMAQ                    | -136.456 | -135.456 | 9.653  | -10.653 |
| 17 | LASMAQS                    | -132.371 | -131.371 | 6.584  | -7.584  |
| 18 | ASMAQSY                    | -139.584 | -138.584 | 8.134  | -9.134  |
| 12 | YQQQQQGQSGGAFSSLASMAQSYLGG |          |          |        |         |
| 0  | YQQQQQG                    | -97.305  | -96.305  | 11.766 | -12.766 |
| 1  | QQQQGQS                    | -125.598 | -124.598 | 10.082 | -11.082 |
| 2  | QQQGQSG                    | -127.229 | -126.229 | 6.358  | -7.358  |
| 3  | QQGQSGG                    | -128.012 | -127.012 | 5.419  | -6.419  |
| 4  | QGQSGGA                    | -124.443 | -123.443 | 8.505  | -9.505  |
| 5  | GQSGGAF                    | -137.919 | -136.919 | 9.679  | -10.679 |
| 6  | QSGGAFS                    | -125.286 | -124.286 | 8.696  | -9.696  |
| 7  | SGGAFSS                    | -139.552 | -138.552 | 6.304  | -7.304  |
| 8  | GGAFSSL                    | -136.007 | -135.007 | 9.513  | -10.513 |
| 9  | GAFSSLA                    | -120.949 | -119.949 | 8.461  | -9.461  |

|    |    |                           |          |          |        |         |
|----|----|---------------------------|----------|----------|--------|---------|
|    | 10 | AFSSLAS                   | -136.520 | -135.520 | 8.004  | -9.004  |
|    | 11 | FSSLASM                   | -115.353 | -114.353 | 7.252  | -8.252  |
|    | 12 | SSLASMA                   | -141.178 | -140.178 | 7.914  | -8.914  |
|    | 13 | SLASMAQ                   | -136.456 | -135.456 | 9.653  | -10.653 |
|    | 14 | LASMAQS                   | -132.371 | -131.371 | 6.584  | -7.584  |
|    | 15 | ASMAQSY                   | -139.584 | -138.584 | 8.134  | -9.134  |
|    | 16 | SMAQSYL                   | -134.378 | -133.378 | 11.357 | -12.357 |
|    | 17 | MAQSYLG                   | -125.471 | -124.471 | 8.762  | -9.762  |
|    | 18 | AQSYLGG                   | -139.979 | -138.979 | 6.884  | -7.884  |
| 13 |    | QQGQSGGAFSSLASMAQSYLGGGQT |          |          |        |         |
|    | 0  | QQGQSGG                   | -128.012 | -127.012 | 5.419  | -6.419  |
|    | 1  | QGQSGGA                   | -124.443 | -123.443 | 8.505  | -9.505  |
|    | 2  | GQSGGAF                   | -137.919 | -136.919 | 9.679  | -10.679 |
|    | 3  | QSGGAFS                   | -125.286 | -124.286 | 8.696  | -9.696  |
|    | 4  | SGGAFSS                   | -139.552 | -138.552 | 6.304  | -7.304  |
|    | 5  | GGAFSSL                   | -136.007 | -135.007 | 9.513  | -10.513 |
|    | 6  | GAFSSLA                   | -120.949 | -119.949 | 8.461  | -9.461  |
|    | 7  | AFSSLAS                   | -136.520 | -135.520 | 8.004  | -9.004  |
|    | 8  | FSSLASM                   | -115.353 | -114.353 | 7.252  | -8.252  |
|    | 9  | SSLASMA                   | -141.178 | -140.178 | 7.914  | -8.914  |
|    | 10 | SLASMAQ                   | -136.456 | -135.456 | 9.653  | -10.653 |
|    | 11 | LASMAQS                   | -132.371 | -131.371 | 6.584  | -7.584  |
|    | 12 | ASMAQSY                   | -139.584 | -138.584 | 8.134  | -9.134  |
|    | 13 | SMAQSYL                   | -134.378 | -133.378 | 11.357 | -12.357 |
|    | 14 | MAQSYLG                   | -125.471 | -124.471 | 8.762  | -9.762  |
|    | 15 | AQSYLGG                   | -139.979 | -138.979 | 6.884  | -7.884  |
|    | 16 | QSYLGGG                   | -95.098  | -94.098  | 8.395  | -9.395  |
|    | 17 | SYLGGGQ                   | -133.775 | -132.775 | 12.440 | -13.440 |
|    | 18 | YLGGGQT                   | -103.288 | -102.288 | 11.516 | -12.516 |
| 14 |    | QSGGAFSSLASMAQSYLGGGQTQSN |          |          |        |         |
|    | 0  | QSGGAFS                   | -125.286 | -124.286 | 8.696  | -9.696  |
|    | 1  | SGGAFSS                   | -139.552 | -138.552 | 6.304  | -7.304  |
|    | 2  | GGAFSSL                   | -136.007 | -135.007 | 9.513  | -10.513 |
|    | 3  | GAFSSLA                   | -120.949 | -119.949 | 8.461  | -9.461  |
|    | 4  | AFSSLAS                   | -136.520 | -135.520 | 8.004  | -9.004  |
|    | 5  | FSSLASM                   | -115.353 | -114.353 | 7.252  | -8.252  |
|    | 6  | SSLASMA                   | -141.178 | -140.178 | 7.914  | -8.914  |
|    | 7  | SLASMAQ                   | -136.456 | -135.456 | 9.653  | -10.653 |
|    | 8  | LASMAQS                   | -132.371 | -131.371 | 6.584  | -7.584  |
|    | 9  | ASMAQSY                   | -139.584 | -138.584 | 8.134  | -9.134  |
|    | 10 | SMAQSYL                   | -134.378 | -133.378 | 11.357 | -12.357 |
|    | 11 | MAQSYLG                   | -125.471 | -124.471 | 8.762  | -9.762  |
|    | 12 | AQSYLGG                   | -139.979 | -138.979 | 6.884  | -7.884  |
|    | 13 | QSYLGGG                   | -95.098  | -94.098  | 8.395  | -9.395  |
|    | 14 | SYLGGGQ                   | -133.775 | -132.775 | 12.440 | -13.440 |

|    |    |                           |          |          |        |         |
|----|----|---------------------------|----------|----------|--------|---------|
|    | 15 | YLGGGQT                   | -103.288 | -102.288 | 11.516 | -12.516 |
|    | 16 | LGGGQTQ                   | -127.136 | -126.136 | 7.117  | -8.117  |
|    | 17 | GGGQTQS                   | -140.464 | -139.464 | 4.875  | -5.875  |
|    | 18 | GGQTQSN                   | -143.736 | -142.736 | 4.912  | -5.912  |
| 15 |    | GAFSSLASMAQSYLGGGQTQSNQQQ |          |          |        |         |
|    | 0  | GAFSSLA                   | -120.949 | -119.949 | 8.461  | -9.461  |
|    | 1  | AFSSLAS                   | -136.520 | -135.520 | 8.004  | -9.004  |
|    | 2  | FSSLASM                   | -115.353 | -114.353 | 7.252  | -8.252  |
|    | 3  | SSLASMA                   | -141.178 | -140.178 | 7.914  | -8.914  |
|    | 4  | SLASMAQ                   | -136.456 | -135.456 | 9.653  | -10.653 |
|    | 5  | LASMAQS                   | -132.371 | -131.371 | 6.584  | -7.584  |
|    | 6  | ASMAQSY                   | -139.584 | -138.584 | 8.134  | -9.134  |
|    | 7  | SMAQSYL                   | -134.378 | -133.378 | 11.357 | -12.357 |
|    | 8  | MAQSYLG                   | -125.471 | -124.471 | 8.762  | -9.762  |
|    | 9  | AQSYLGG                   | -139.979 | -138.979 | 6.884  | -7.884  |
|    | 10 | QSYLGGG                   | -95.098  | -94.098  | 8.395  | -9.395  |
|    | 11 | SYLGGGQ                   | -133.775 | -132.775 | 12.440 | -13.440 |
|    | 12 | YLGGGQT                   | -103.288 | -102.288 | 11.516 | -12.516 |
|    | 13 | LGGGQTQ                   | -127.136 | -126.136 | 7.117  | -8.117  |
|    | 14 | GGGQTQS                   | -140.464 | -139.464 | 4.875  | -5.875  |
|    | 15 | GGQTQSN                   | -143.736 | -142.736 | 4.912  | -5.912  |
|    | 16 | GQTQSNQ                   | -140.306 | -139.306 | 6.608  | -7.608  |
|    | 17 | QTQSNQQ                   | -126.320 | -125.320 | 9.815  | -10.815 |
|    | 18 | TQSNQQQ                   | -134.023 | -133.023 | 7.313  | -8.313  |
| 16 |    | SSLASMAQSYLGGGQTQSNQQQYNQ |          |          |        |         |
|    | 0  | SSLASMA                   | -141.178 | -140.178 | 7.914  | -8.914  |
|    | 1  | SLASMAQ                   | -136.456 | -135.456 | 9.653  | -10.653 |
|    | 2  | LASMAQS                   | -132.371 | -131.371 | 6.584  | -7.584  |
|    | 3  | ASMAQSY                   | -139.584 | -138.584 | 8.134  | -9.134  |
|    | 4  | SMAQSYL                   | -134.378 | -133.378 | 11.357 | -12.357 |
|    | 5  | MAQSYLG                   | -125.471 | -124.471 | 8.762  | -9.762  |
|    | 6  | AQSYLGG                   | -139.979 | -138.979 | 6.884  | -7.884  |
|    | 7  | QSYLGGG                   | -95.098  | -94.098  | 8.395  | -9.395  |
|    | 8  | SYLGGGQ                   | -133.775 | -132.775 | 12.440 | -13.440 |
|    | 9  | YLGGGQT                   | -103.288 | -102.288 | 11.516 | -12.516 |
|    | 10 | LGGGQTQ                   | -127.136 | -126.136 | 7.117  | -8.117  |
|    | 11 | GGGQTQS                   | -140.464 | -139.464 | 4.875  | -5.875  |
|    | 12 | GGQTQSN                   | -143.736 | -142.736 | 4.912  | -5.912  |
|    | 13 | GQTQSNQ                   | -140.306 | -139.306 | 6.608  | -7.608  |
|    | 14 | QTQSNQQ                   | -126.320 | -125.320 | 9.815  | -10.815 |
|    | 15 | TQSNQQQ                   | -134.023 | -133.023 | 7.313  | -8.313  |
|    | 16 | QSNQQQY                   | -122.599 | -121.599 | 10.207 | -11.207 |
|    | 17 | SNQQQYN                   | -136.028 | -135.028 | 7.832  | -8.832  |
|    | 18 | NQQQYNQ                   | -124.588 | -123.588 | 10.305 | -11.305 |
| 17 |    | YLGGGQTQSNQQQYNQQGQNNQQQY |          |          |        |         |



|    |    |                           |          |          |        |         |
|----|----|---------------------------|----------|----------|--------|---------|
|    | 0  | YLGGGQT                   | -103.288 | -102.288 | 11.516 | -12.516 |
|    | 1  | LGGGQTQ                   | -127.136 | -126.136 | 7.117  | -8.117  |
|    | 2  | GGGQTQS                   | -140.464 | -139.464 | 4.875  | -5.875  |
|    | 3  | GGQTQSN                   | -143.736 | -142.736 | 4.912  | -5.912  |
|    | 4  | GQTQSNQ                   | -140.306 | -139.306 | 6.608  | -7.608  |
|    | 5  | QTQSNQQ                   | -126.320 | -125.320 | 9.815  | -10.815 |
|    | 6  | TQSNQQQ                   | -134.023 | -133.023 | 7.313  | -8.313  |
|    | 7  | QSNQQQY                   | -122.599 | -121.599 | 10.207 | -11.207 |
|    | 8  | SNQQQYN                   | -136.028 | -135.028 | 7.832  | -8.832  |
|    | 9  | NQQQYNQ                   | -124.588 | -123.588 | 10.305 | -11.305 |
|    | 10 | QQQYNQQ                   | -125.199 | -124.199 | 13.452 | -14.452 |
|    | 11 | QQYNQQG                   | -97.586  | -96.586  | 7.013  | -8.013  |
|    | 12 | QYNQQGQ                   | -118.097 | -117.097 | 11.535 | -12.535 |
|    | 13 | YNQQGQN                   | -100.643 | -99.643  | 8.766  | -9.766  |
|    | 14 | NQQGQNN                   | -128.944 | -127.944 | 6.685  | -7.685  |
|    | 15 | QQGQNNQ                   | -127.110 | -126.110 | 9.088  | -10.088 |
|    | 16 | QGQNNQQ                   | -125.262 | -124.262 | 10.631 | -11.631 |
|    | 17 | GQNNQQQ                   | -132.547 | -131.547 | 8.145  | -9.145  |
|    | 18 | QNNQQQY                   | -121.988 | -120.988 | 10.823 | -11.823 |
| 18 |    | NQQQYNQQGQNNQQQYQQQGQNYQH |          |          |        |         |
|    | 0  | NQQQYNQ                   | -124.588 | -123.588 | 10.305 | -11.305 |
|    | 1  | QQQYNQQ                   | -125.199 | -124.199 | 13.452 | -14.452 |
|    | 2  | QQYNQQG                   | -97.586  | -96.586  | 7.013  | -8.013  |
|    | 3  | QYNQQGQ                   | -118.097 | -117.097 | 11.535 | -12.535 |
|    | 4  | YNQQGQN                   | -100.643 | -99.643  | 8.766  | -9.766  |
|    | 5  | NQQGQNN                   | -128.944 | -127.944 | 6.685  | -7.685  |
|    | 6  | QQGQNNQ                   | -127.110 | -126.110 | 9.088  | -10.088 |
|    | 7  | QGQNNQQ                   | -125.262 | -124.262 | 10.631 | -11.631 |
|    | 8  | GQNNQQQ                   | -132.547 | -131.547 | 8.145  | -9.145  |
|    | 9  | QNNQQQY                   | -121.988 | -120.988 | 10.823 | -11.823 |
|    | 10 | NNQQQYQ                   | -126.054 | -125.054 | 9.868  | -10.868 |
|    | 11 | NQQQYQQ                   | -124.217 | -123.217 | 11.768 | -12.768 |
|    | 12 | QQQYQQQ                   | -124.959 | -123.959 | 12.083 | -13.083 |
|    | 13 | QQYQQQG                   | -97.044  | -96.044  | 7.633  | -8.633  |
|    | 14 | QYQQQGQ                   | -123.386 | -122.386 | 12.676 | -13.676 |
|    | 15 | YQQQGQN                   | -99.352  | -98.352  | 9.501  | -10.501 |
|    | 16 | QQQGQNY                   | -126.064 | -125.064 | 12.430 | -13.430 |
|    | 17 | QQGQNYQ                   | -123.643 | -122.643 | 12.942 | -13.942 |
|    | 18 | QGQNYQH                   | -122.067 | -121.067 | 13.042 | -14.042 |
| 19 |    | QYNQQGQNNQQQYQQQGQNYQHQQQ |          |          |        |         |
|    | 0  | QYNQQGQ                   | -118.097 | -117.097 | 11.535 | -12.535 |
|    | 1  | YNQQGQN                   | -100.643 | -99.643  | 8.766  | -9.766  |
|    | 2  | NQQGQNN                   | -128.944 | -127.944 | 6.685  | -7.685  |
|    | 3  | QQGQNNQ                   | -127.110 | -126.110 | 9.088  | -10.088 |
|    | 4  | QGQNNQQ                   | -125.262 | -124.262 | 10.631 | -11.631 |

|    |         |          |          |        |         |
|----|---------|----------|----------|--------|---------|
| 5  | GQNNQQQ | -132.547 | -131.547 | 8.145  | -9.145  |
| 6  | QNNQQQY | -121.988 | -120.988 | 10.823 | -11.823 |
| 7  | NNQQQYQ | -126.054 | -125.054 | 9.868  | -10.868 |
| 8  | NQQQYQQ | -124.217 | -123.217 | 11.768 | -12.768 |
| 9  | QQQYQQQ | -124.959 | -123.959 | 12.083 | -13.083 |
| 10 | QQYQQQG | -97.044  | -96.044  | 7.633  | -8.633  |
| 11 | QYQQQGQ | -123.386 | -122.386 | 12.676 | -13.676 |
| 12 | YQQQGQN | -99.352  | -98.352  | 9.501  | -10.501 |
| 13 | QQQGQNY | -126.064 | -125.064 | 12.430 | -13.430 |
| 14 | QQGQNYQ | -123.643 | -122.643 | 12.942 | -13.942 |
| 15 | QGQNYQH | -122.067 | -121.067 | 13.042 | -14.042 |
| 16 | GQNYQHQ | -130.685 | -129.685 | 11.368 | -12.368 |
| 17 | QNYQHQQ | -93.858  | -92.858  | 12.831 | -13.831 |
| 18 | NYQHQQQ | -126.167 | -125.167 | 10.365 | -11.365 |

20

QQGQNNQQQYQQQGQNYQHQQQGQQ

|    |         |          |          |        |         |
|----|---------|----------|----------|--------|---------|
| 0  | QQGQNNQ | -127.110 | -126.110 | 9.088  | -10.088 |
| 1  | QGQNNQQ | -125.262 | -124.262 | 10.631 | -11.631 |
| 2  | GQNNQQQ | -132.547 | -131.547 | 8.145  | -9.145  |
| 3  | QNNQQQY | -121.988 | -120.988 | 10.823 | -11.823 |
| 4  | NNQQQYQ | -126.054 | -125.054 | 9.868  | -10.868 |
| 5  | NQQQYQQ | -124.217 | -123.217 | 11.768 | -12.768 |
| 6  | QQQYQQQ | -124.959 | -123.959 | 12.083 | -13.083 |
| 7  | QQYQQQG | -97.044  | -96.044  | 7.633  | -8.633  |
| 8  | QYQQQGQ | -123.386 | -122.386 | 12.676 | -13.676 |
| 9  | YQQQGQN | -99.352  | -98.352  | 9.501  | -10.501 |
| 10 | QQQGQNY | -126.064 | -125.064 | 12.430 | -13.430 |
| 11 | QQGQNYQ | -123.643 | -122.643 | 12.942 | -13.942 |
| 12 | QGQNYQH | -122.067 | -121.067 | 13.042 | -14.042 |
| 13 | GQNYQHQ | -130.685 | -129.685 | 11.368 | -12.368 |
| 14 | QNYQHQQ | -93.858  | -92.858  | 12.831 | -13.831 |
| 15 | NYQHQQQ | -126.167 | -125.167 | 10.365 | -11.365 |
| 16 | YQHQQQG | -97.782  | -96.782  | 8.462  | -9.462  |
| 17 | QHQQQGQ | -122.014 | -121.014 | 12.410 | -13.410 |
| 18 | HQQQGQQ | -122.432 | -121.432 | 11.881 | -12.881 |

21

QNNQQQYQQQGQNYQHQQQGQQQQQ

|   |         |          |          |        |         |
|---|---------|----------|----------|--------|---------|
| 0 | QNNQQQY | -121.988 | -120.988 | 10.823 | -11.823 |
| 1 | NNQQQYQ | -126.054 | -125.054 | 9.868  | -10.868 |
| 2 | NQQQYQQ | -124.217 | -123.217 | 11.768 | -12.768 |
| 3 | QQQYQQQ | -124.959 | -123.959 | 12.083 | -13.083 |
| 4 | QQYQQQG | -97.044  | -96.044  | 7.633  | -8.633  |
| 5 | QYQQQGQ | -123.386 | -122.386 | 12.676 | -13.676 |
| 6 | YQQQGQN | -99.352  | -98.352  | 9.501  | -10.501 |
| 7 | QQQGQNY | -126.064 | -125.064 | 12.430 | -13.430 |
| 8 | QQGQNYQ | -123.643 | -122.643 | 12.942 | -13.942 |
| 9 | QGQNYQH | -122.067 | -121.067 | 13.042 | -14.042 |

|    |                          |          |          |        |         |
|----|--------------------------|----------|----------|--------|---------|
| 10 | GQNYQHQ                  | -130.685 | -129.685 | 11.368 | -12.368 |
| 11 | QNYQHQQ                  | -93.858  | -92.858  | 12.831 | -13.831 |
| 12 | NYQHQQQ                  | -126.167 | -125.167 | 10.365 | -11.365 |
| 13 | YQHQQQG                  | -97.782  | -96.782  | 8.462  | -9.462  |
| 14 | QHQQQGQ                  | -122.014 | -121.014 | 12.410 | -13.410 |
| 15 | HQQQGQQ                  | -122.432 | -121.432 | 11.881 | -12.881 |
| 16 | QQQGQQQ                  | -123.968 | -122.968 | 10.537 | -11.537 |
| 17 | QQGQQQQ                  | -125.913 | -124.913 | 9.284  | -10.284 |
| 18 | QGQQQQQ                  | -124.935 | -123.935 | 9.916  | -10.916 |
| 22 | QQQYQQQGQNYQHQQQGQQQQGHS |          |          |        |         |
| 0  | QQQYQQQ                  | -124.959 | -123.959 | 12.083 | -13.083 |
| 1  | QQYQQQG                  | -97.044  | -96.044  | 7.633  | -8.633  |
| 2  | QYQQQGQ                  | -123.386 | -122.386 | 12.676 | -13.676 |
| 3  | YQQQGQN                  | -99.352  | -98.352  | 9.501  | -10.501 |
| 4  | QQQGQNY                  | -126.064 | -125.064 | 12.430 | -13.430 |
| 5  | QQGQNYQ                  | -123.643 | -122.643 | 12.942 | -13.942 |
| 6  | QGQNYQH                  | -122.067 | -121.067 | 13.042 | -14.042 |
| 7  | GQNYQHQ                  | -130.685 | -129.685 | 11.368 | -12.368 |
| 8  | QNYQHQQ                  | -93.858  | -92.858  | 12.831 | -13.831 |
| 9  | NYQHQQQ                  | -126.167 | -125.167 | 10.365 | -11.365 |
| 10 | YQHQQQG                  | -97.782  | -96.782  | 8.462  | -9.462  |
| 11 | QHQQQGQ                  | -122.014 | -121.014 | 12.410 | -13.410 |
| 12 | HQQQGQQ                  | -122.432 | -121.432 | 11.881 | -12.881 |
| 13 | QQQGQQQ                  | -123.968 | -122.968 | 10.537 | -11.537 |
| 14 | QQGQQQQ                  | -125.913 | -124.913 | 9.284  | -10.284 |
| 15 | QGQQQQQ                  | -124.935 | -123.935 | 9.916  | -10.916 |
| 16 | GQQQQQG                  | -144.098 | -143.098 | 6.515  | -7.515  |
| 17 | QQQQQGH                  | -121.966 | -120.966 | 11.760 | -12.760 |
| 18 | QQQQGHS                  | -125.039 | -124.039 | 11.175 | -12.175 |
| 23 | QGQNYQHQQQGQQQQGHSSSFSAL |          |          |        |         |
| 0  | QGQNYQH                  | -122.067 | -121.067 | 13.042 | -14.042 |
| 1  | GQNYQHQ                  | -130.685 | -129.685 | 11.368 | -12.368 |
| 2  | QNYQHQQ                  | -93.858  | -92.858  | 12.831 | -13.831 |
| 3  | NYQHQQQ                  | -126.167 | -125.167 | 10.365 | -11.365 |
| 4  | YQHQQQG                  | -97.782  | -96.782  | 8.462  | -9.462  |
| 5  | QHQQQGQ                  | -122.014 | -121.014 | 12.410 | -13.410 |
| 6  | HQQQGQQ                  | -122.432 | -121.432 | 11.881 | -12.881 |
| 7  | QQQGQQQ                  | -123.968 | -122.968 | 10.537 | -11.537 |
| 8  | QQGQQQQ                  | -125.913 | -124.913 | 9.284  | -10.284 |
| 9  | QGQQQQQ                  | -124.935 | -123.935 | 9.916  | -10.916 |
| 10 | GQQQQQG                  | -144.098 | -143.098 | 6.515  | -7.515  |
| 11 | QQQQQGH                  | -121.966 | -120.966 | 11.760 | -12.760 |
| 12 | QQQQGHS                  | -125.039 | -124.039 | 11.175 | -12.175 |
| 13 | QQQGHS                   | -126.897 | -125.897 | 9.967  | -10.967 |
| 14 | QQGHSS                   | -126.586 | -125.586 | 7.257  | -8.257  |

|    |    |                          |          |          |        |         |
|----|----|--------------------------|----------|----------|--------|---------|
|    | 15 | QGHSSSF                  | -113.130 | -112.130 | 10.777 | -11.777 |
|    | 16 | GHSSSFS                  | -139.122 | -138.122 | 10.645 | -11.645 |
|    | 17 | HSSSFSA                  | -125.985 | -124.985 | 9.709  | -10.709 |
|    | 18 | SSSFAL                   | -133.757 | -132.757 | 8.489  | -9.489  |
| 24 |    | NYQHQQQGQQQQGHSSSFALASM  |          |          |        |         |
|    | 0  | NYQHQQQ                  | -126.167 | -125.167 | 10.365 | -11.365 |
|    | 1  | YQHQQQG                  | -97.782  | -96.782  | 8.462  | -9.462  |
|    | 2  | QHQQQGQ                  | -122.014 | -121.014 | 12.410 | -13.410 |
|    | 3  | HQQQGQQ                  | -122.432 | -121.432 | 11.881 | -12.881 |
|    | 4  | QQQGQQQ                  | -123.968 | -122.968 | 10.537 | -11.537 |
|    | 5  | QQGQQQQ                  | -125.913 | -124.913 | 9.284  | -10.284 |
|    | 6  | QGQQQQQ                  | -124.935 | -123.935 | 9.916  | -10.916 |
|    | 7  | GQQQQQG                  | -144.098 | -143.098 | 6.515  | -7.515  |
|    | 8  | QQQQQGH                  | -121.966 | -120.966 | 11.760 | -12.760 |
|    | 9  | QQQQGHS                  | -125.039 | -124.039 | 11.175 | -12.175 |
|    | 10 | QQQGHSS                  | -126.897 | -125.897 | 9.967  | -10.967 |
|    | 11 | QQGHSSS                  | -126.586 | -125.586 | 7.257  | -8.257  |
|    | 12 | QGHSSSF                  | -113.130 | -112.130 | 10.777 | -11.777 |
|    | 13 | GHSSSFS                  | -139.122 | -138.122 | 10.645 | -11.645 |
|    | 14 | HSSSFSA                  | -125.985 | -124.985 | 9.709  | -10.709 |
|    | 15 | SSSFAL                   | -133.757 | -132.757 | 8.489  | -9.489  |
|    | 16 | SSFSALA                  | -119.396 | -118.396 | 7.892  | -8.892  |
|    | 17 | SFSALAS                  | -136.817 | -135.817 | 7.995  | -8.995  |
|    | 18 | FSALASM                  | -117.740 | -116.740 | 7.414  | -8.414  |
| 25 |    | QGQQQQQGHHSSSFALASMASSYL |          |          |        |         |
|    | 0  | QGQQQQQ                  | -124.935 | -123.935 | 9.916  | -10.916 |
|    | 1  | GQQQQQG                  | -144.098 | -143.098 | 6.515  | -7.515  |
|    | 2  | QQQQQGH                  | -121.966 | -120.966 | 11.760 | -12.760 |
|    | 3  | QQQQGHS                  | -125.039 | -124.039 | 11.175 | -12.175 |
|    | 4  | QQQGHSS                  | -126.897 | -125.897 | 9.967  | -10.967 |
|    | 5  | QQGHSSS                  | -126.586 | -125.586 | 7.257  | -8.257  |
|    | 6  | QGHSSSF                  | -113.130 | -112.130 | 10.777 | -11.777 |
|    | 7  | GHSSSFS                  | -139.122 | -138.122 | 10.645 | -11.645 |
|    | 8  | HSSSFSA                  | -125.985 | -124.985 | 9.709  | -10.709 |
|    | 9  | SSSFAL                   | -133.757 | -132.757 | 8.489  | -9.489  |
|    | 10 | SSFSALA                  | -119.396 | -118.396 | 7.892  | -8.892  |
|    | 11 | SFSALAS                  | -136.817 | -135.817 | 7.995  | -8.995  |
|    | 12 | FSALASM                  | -117.740 | -116.740 | 7.414  | -8.414  |
|    | 13 | SALASMA                  | -141.557 | -140.557 | 7.795  | -8.795  |
|    | 14 | ALASMAS                  | -136.618 | -135.618 | 7.888  | -8.888  |
|    | 15 | LASSMASS                 | -133.471 | -132.471 | 5.242  | -6.242  |
|    | 16 | ASSMASSY                 | -136.244 | -135.244 | 9.120  | -10.120 |
|    | 17 | SMASSYL                  | -133.161 | -132.161 | 11.023 | -12.023 |
|    | 18 | MASSYL                   | -126.605 | -125.605 | 7.000  | -8.000  |
| 26 |    | QQQQGHSSSFALASMASSYLGNS  |          |          |        |         |

|    |          |          |          |        |         |
|----|----------|----------|----------|--------|---------|
| 0  | QQQQGHS  | -125.039 | -124.039 | 11.175 | -12.175 |
| 1  | QQQGHSS  | -126.897 | -125.897 | 9.967  | -10.967 |
| 2  | QQGHSSS  | -126.586 | -125.586 | 7.257  | -8.257  |
| 3  | QGHSSSF  | -113.130 | -112.130 | 10.777 | -11.777 |
| 4  | GHSSSFS  | -139.122 | -138.122 | 10.645 | -11.645 |
| 5  | HSSSFSA  | -125.985 | -124.985 | 9.709  | -10.709 |
| 6  | SSSFSA   | -133.757 | -132.757 | 8.489  | -9.489  |
| 7  | SSFSALA  | -119.396 | -118.396 | 7.892  | -8.892  |
| 8  | SFSALAS  | -136.817 | -135.817 | 7.995  | -8.995  |
| 9  | FSALASM  | -117.740 | -116.740 | 7.414  | -8.414  |
| 10 | SALASMA  | -141.557 | -140.557 | 7.795  | -8.795  |
| 11 | ALASMAS  | -136.618 | -135.618 | 7.888  | -8.888  |
| 12 | LASSMASS | -133.471 | -132.471 | 5.242  | -6.242  |
| 13 | ASSMASSY | -136.244 | -135.244 | 9.120  | -10.120 |
| 14 | SMASSYL  | -133.161 | -132.161 | 11.023 | -12.023 |
| 15 | MASSYLG  | -126.605 | -125.605 | 7.000  | -8.000  |
| 16 | ASSYLGNN | -136.932 | -135.932 | 7.590  | -8.590  |
| 17 | SSYLGNN  | -110.172 | -109.172 | 9.476  | -10.476 |
| 18 | SYLGNNNS | -138.245 | -137.245 | 9.537  | -10.537 |

27

QQGHSSSFSAALASMASSYLGNNNSNS

|    |          |          |          |        |         |
|----|----------|----------|----------|--------|---------|
| 0  | QQGHSSS  | -126.586 | -125.586 | 7.257  | -8.257  |
| 1  | QGHSSSF  | -113.130 | -112.130 | 10.777 | -11.777 |
| 2  | GHSSSFS  | -139.122 | -138.122 | 10.645 | -11.645 |
| 3  | HSSSFSA  | -125.985 | -124.985 | 9.709  | -10.709 |
| 4  | SSSFSA   | -133.757 | -132.757 | 8.489  | -9.489  |
| 5  | SSFSALA  | -119.396 | -118.396 | 7.892  | -8.892  |
| 6  | SFSALAS  | -136.817 | -135.817 | 7.995  | -8.995  |
| 7  | FSALASM  | -117.740 | -116.740 | 7.414  | -8.414  |
| 8  | SALASMA  | -141.557 | -140.557 | 7.795  | -8.795  |
| 9  | ALASMAS  | -136.618 | -135.618 | 7.888  | -8.888  |
| 10 | LASSMASS | -133.471 | -132.471 | 5.242  | -6.242  |
| 11 | ASSMASSY | -136.244 | -135.244 | 9.120  | -10.120 |
| 12 | SMASSYL  | -133.161 | -132.161 | 11.023 | -12.023 |
| 13 | MASSYLG  | -126.605 | -125.605 | 7.000  | -8.000  |
| 14 | ASSYLGNN | -136.932 | -135.932 | 7.590  | -8.590  |
| 15 | SSYLGNN  | -110.172 | -109.172 | 9.476  | -10.476 |
| 16 | SYLGNNNS | -138.245 | -137.245 | 9.537  | -10.537 |
| 17 | YLGNNNSN | -106.496 | -105.496 | 9.060  | -10.060 |
| 18 | LGNNNSNS | -126.862 | -125.862 | 6.345  | -7.345  |

28

HSSSFSAALASMASSYLGNNNSNSNSS

|   |         |          |          |       |         |
|---|---------|----------|----------|-------|---------|
| 0 | HSSSFSA | -125.985 | -124.985 | 9.709 | -10.709 |
| 1 | SSSFSA  | -133.757 | -132.757 | 8.489 | -9.489  |
| 2 | SSFSALA | -119.396 | -118.396 | 7.892 | -8.892  |
| 3 | SFSALAS | -136.817 | -135.817 | 7.995 | -8.995  |
| 4 | FSALASM | -117.740 | -116.740 | 7.414 | -8.414  |

|    |    |                             |          |          |        |         |
|----|----|-----------------------------|----------|----------|--------|---------|
|    | 5  | SALASMA                     | -141.557 | -140.557 | 7.795  | -8.795  |
|    | 6  | ALASMAS                     | -136.618 | -135.618 | 7.888  | -8.888  |
|    | 7  | LASSMASS                    | -133.471 | -132.471 | 5.242  | -6.242  |
|    | 8  | ASSMASSY                    | -136.244 | -135.244 | 9.120  | -10.120 |
|    | 9  | SMASSYL                     | -133.161 | -132.161 | 11.023 | -12.023 |
|    | 10 | MASSYLG                     | -126.605 | -125.605 | 7.000  | -8.000  |
|    | 11 | ASSYLGN                     | -136.932 | -135.932 | 7.590  | -8.590  |
|    | 12 | SSYLGNN                     | -110.172 | -109.172 | 9.476  | -10.476 |
|    | 13 | SYLGNNNS                    | -138.245 | -137.245 | 9.537  | -10.537 |
|    | 14 | YLGNNNSN                    | -106.496 | -105.496 | 9.060  | -10.060 |
|    | 15 | LGNNNSNS                    | -126.862 | -125.862 | 6.345  | -7.345  |
|    | 16 | GNNNSNSN                    | -135.967 | -134.967 | 5.195  | -6.195  |
|    | 17 | NNSNSNS                     | -131.628 | -130.628 | 5.333  | -6.333  |
|    | 18 | NSNSNSS                     | -124.428 | -123.428 | 5.410  | -6.410  |
| 29 |    | SFSALASSMASSYLGNNNSNSNSSYGG |          |          |        |         |
|    | 0  | SFSALAS                     | -136.817 | -135.817 | 7.995  | -8.995  |
|    | 1  | FSALASM                     | -117.740 | -116.740 | 7.414  | -8.414  |
|    | 2  | SALASMA                     | -141.557 | -140.557 | 7.795  | -8.795  |
|    | 3  | ALASMAS                     | -136.618 | -135.618 | 7.888  | -8.888  |
|    | 4  | LASSMASS                    | -133.471 | -132.471 | 5.242  | -6.242  |
|    | 5  | ASSMASSY                    | -136.244 | -135.244 | 9.120  | -10.120 |
|    | 6  | SMASSYL                     | -133.161 | -132.161 | 11.023 | -12.023 |
|    | 7  | MASSYLG                     | -126.605 | -125.605 | 7.000  | -8.000  |
|    | 8  | ASSYLGN                     | -136.932 | -135.932 | 7.590  | -8.590  |
|    | 9  | SSYLGNN                     | -110.172 | -109.172 | 9.476  | -10.476 |
|    | 10 | SYLGNNNS                    | -138.245 | -137.245 | 9.537  | -10.537 |
|    | 11 | YLGNNNSN                    | -106.496 | -105.496 | 9.060  | -10.060 |
|    | 12 | LGNNNSNS                    | -126.862 | -125.862 | 6.345  | -7.345  |
|    | 13 | GNNNSNSN                    | -135.967 | -134.967 | 5.195  | -6.195  |
|    | 14 | NNSNSNS                     | -131.628 | -130.628 | 5.333  | -6.333  |
|    | 15 | NSNSNSS                     | -124.428 | -123.428 | 5.410  | -6.410  |
|    | 16 | SNSNSSY                     | -135.519 | -134.519 | 9.073  | -10.073 |
|    | 17 | NSNSSYG                     | -123.996 | -122.996 | 6.838  | -7.838  |
|    | 18 | SNSSYGG                     | -137.454 | -136.454 | 5.879  | -6.879  |
| 30 |    | ALASSMASSYLGNNNSNSNSSYGGQQQ |          |          |        |         |
|    | 0  | ALASMAS                     | -136.618 | -135.618 | 7.888  | -8.888  |
|    | 1  | LASSMASS                    | -133.471 | -132.471 | 5.242  | -6.242  |
|    | 2  | ASSMASSY                    | -136.244 | -135.244 | 9.120  | -10.120 |
|    | 3  | SMASSYL                     | -133.161 | -132.161 | 11.023 | -12.023 |
|    | 4  | MASSYLG                     | -126.605 | -125.605 | 7.000  | -8.000  |
|    | 5  | ASSYLGN                     | -136.932 | -135.932 | 7.590  | -8.590  |
|    | 6  | SSYLGNN                     | -110.172 | -109.172 | 9.476  | -10.476 |
|    | 7  | SYLGNNNS                    | -138.245 | -137.245 | 9.537  | -10.537 |
|    | 8  | YLGNNNSN                    | -106.496 | -105.496 | 9.060  | -10.060 |
|    | 9  | LGNNNSNS                    | -126.862 | -125.862 | 6.345  | -7.345  |

|    |                            |          |          |        |         |
|----|----------------------------|----------|----------|--------|---------|
| 10 | GNNNSNSN                   | -135.967 | -134.967 | 5.195  | -6.195  |
| 11 | NNSNSNS                    | -131.628 | -130.628 | 5.333  | -6.333  |
| 12 | NSNSNSS                    | -124.428 | -123.428 | 5.410  | -6.410  |
| 13 | SNSNSSY                    | -135.519 | -134.519 | 9.073  | -10.073 |
| 14 | NSNSSYG                    | -123.996 | -122.996 | 6.838  | -7.838  |
| 15 | SNSSYGG                    | -137.454 | -136.454 | 5.879  | -6.879  |
| 16 | NSSYGGQ                    | -126.302 | -125.302 | 10.707 | -11.707 |
| 17 | SSYGGQQ                    | -109.320 | -108.320 | 9.651  | -10.651 |
| 18 | SYGGQQQ                    | -134.276 | -133.276 | 9.719  | -10.719 |
| 31 | SMASSYLGNNNSNSNSSYGGQQQANE |          |          |        |         |
| 0  | SMASSYL                    | -133.161 | -132.161 | 11.023 | -12.023 |
| 1  | MASSYLG                    | -126.605 | -125.605 | 7.000  | -8.000  |
| 2  | ASSYLG                     | -136.932 | -135.932 | 7.590  | -8.590  |
| 3  | SSYLGNN                    | -110.172 | -109.172 | 9.476  | -10.476 |
| 4  | SYLGNNNS                   | -138.245 | -137.245 | 9.537  | -10.537 |
| 5  | YLGNNNSN                   | -106.496 | -105.496 | 9.060  | -10.060 |
| 6  | LGNNNSNS                   | -126.862 | -125.862 | 6.345  | -7.345  |
| 7  | GNNNSNSN                   | -135.967 | -134.967 | 5.195  | -6.195  |
| 8  | NNSNSNS                    | -131.628 | -130.628 | 5.333  | -6.333  |
| 9  | NSNSNSS                    | -124.428 | -123.428 | 5.410  | -6.410  |
| 10 | SNSNSSY                    | -135.519 | -134.519 | 9.073  | -10.073 |
| 11 | NSNSSYG                    | -123.996 | -122.996 | 6.838  | -7.838  |
| 12 | SNSSYGG                    | -137.454 | -136.454 | 5.879  | -6.879  |
| 13 | NSSYGGQ                    | -126.302 | -125.302 | 10.707 | -11.707 |
| 14 | SSYGGQQ                    | -109.320 | -108.320 | 9.651  | -10.651 |
| 15 | SYGGQQQ                    | -134.276 | -133.276 | 9.719  | -10.719 |
| 16 | YGGQQQA                    | -105.784 | -104.784 | 8.794  | -9.794  |
| 17 | GGQQQAN                    | -142.530 | -141.530 | 6.297  | -7.297  |
| 18 | GQQQANE                    | -144.247 | -143.247 | 8.736  | -9.736  |
| 32 | SSYLGNNNSNSNSSYGGQQQANEYGR |          |          |        |         |
| 0  | SSYLGNN                    | -110.172 | -109.172 | 9.476  | -10.476 |
| 1  | SYLGNNNS                   | -138.245 | -137.245 | 9.537  | -10.537 |
| 2  | YLGNNNSN                   | -106.496 | -105.496 | 9.060  | -10.060 |
| 3  | LGNNNSNS                   | -126.862 | -125.862 | 6.345  | -7.345  |
| 4  | GNNNSNSN                   | -135.967 | -134.967 | 5.195  | -6.195  |
| 5  | NNSNSNS                    | -131.628 | -130.628 | 5.333  | -6.333  |
| 6  | NSNSNSS                    | -124.428 | -123.428 | 5.410  | -6.410  |
| 7  | SNSNSSY                    | -135.519 | -134.519 | 9.073  | -10.073 |
| 8  | NSNSSYG                    | -123.996 | -122.996 | 6.838  | -7.838  |
| 9  | SNSSYGG                    | -137.454 | -136.454 | 5.879  | -6.879  |
| 10 | NSSYGGQ                    | -126.302 | -125.302 | 10.707 | -11.707 |
| 11 | SSYGGQQ                    | -109.320 | -108.320 | 9.651  | -10.651 |
| 12 | SYGGQQQ                    | -134.276 | -133.276 | 9.719  | -10.719 |
| 13 | YGGQQQA                    | -105.784 | -104.784 | 8.794  | -9.794  |
| 14 | GGQQQAN                    | -142.530 | -141.530 | 6.297  | -7.297  |

|    |    |                           |          |          |        |         |
|----|----|---------------------------|----------|----------|--------|---------|
|    | 15 | GQQQANE                   | -144.247 | -143.247 | 8.736  | -9.736  |
|    | 16 | QQQANEY                   | -127.463 | -126.463 | 11.464 | -12.464 |
|    | 17 | QQANEYG                   | -130.110 | -129.110 | 6.883  | -7.883  |
|    | 18 | QANEYGR                   | -119.700 | -118.700 | 8.554  | -9.554  |
| 33 |    | LGNNSNSNSSYGGQQQANEYGRPQQ |          |          |        |         |
|    | 0  | LGNNSNS                   | -126.862 | -125.862 | 6.345  | -7.345  |
|    | 1  | GNNSNSN                   | -135.967 | -134.967 | 5.195  | -6.195  |
|    | 2  | NNSNSNS                   | -131.628 | -130.628 | 5.333  | -6.333  |
|    | 3  | NSNSNSS                   | -124.428 | -123.428 | 5.410  | -6.410  |
|    | 4  | SNSNSSY                   | -135.519 | -134.519 | 9.073  | -10.073 |
|    | 5  | NSNSSYG                   | -123.996 | -122.996 | 6.838  | -7.838  |
|    | 6  | SNSSYGG                   | -137.454 | -136.454 | 5.879  | -6.879  |
|    | 7  | NSSYGGQ                   | -126.302 | -125.302 | 10.707 | -11.707 |
|    | 8  | SSYGGQQ                   | -109.320 | -108.320 | 9.651  | -10.651 |
|    | 9  | SYGGQQQ                   | -134.276 | -133.276 | 9.719  | -10.719 |
|    | 10 | YGGQQQA                   | -105.784 | -104.784 | 8.794  | -9.794  |
|    | 11 | GGQQQAN                   | -142.530 | -141.530 | 6.297  | -7.297  |
|    | 12 | GQQQANE                   | -144.247 | -143.247 | 8.736  | -9.736  |
|    | 13 | QQQANEY                   | -127.463 | -126.463 | 11.464 | -12.464 |
|    | 14 | QQANEYG                   | -130.110 | -129.110 | 6.883  | -7.883  |
|    | 15 | QANEYGR                   | -119.700 | -118.700 | 8.554  | -9.554  |
|    | 16 | ANEYGRP                   | -136.798 | -135.798 | 7.993  | -8.993  |
|    | 17 | NEYGRPQ                   | -82.895  | -81.895  | 11.626 | -12.626 |
|    | 18 | EYGRPQQ                   | -122.905 | -121.905 | 12.291 | -13.291 |
| 34 |    | NSNSNSSYGGQQQANEYGRPQQNGQ |          |          |        |         |
|    | 0  | NSNSNSS                   | -124.428 | -123.428 | 5.410  | -6.410  |
|    | 1  | SNSNSSY                   | -135.519 | -134.519 | 9.073  | -10.073 |
|    | 2  | NSNSSYG                   | -123.996 | -122.996 | 6.838  | -7.838  |
|    | 3  | SNSSYGG                   | -137.454 | -136.454 | 5.879  | -6.879  |
|    | 4  | NSSYGGQ                   | -126.302 | -125.302 | 10.707 | -11.707 |
|    | 5  | SSYGGQQ                   | -109.320 | -108.320 | 9.651  | -10.651 |
|    | 6  | SYGGQQQ                   | -134.276 | -133.276 | 9.719  | -10.719 |
|    | 7  | YGGQQQA                   | -105.784 | -104.784 | 8.794  | -9.794  |
|    | 8  | GGQQQAN                   | -142.530 | -141.530 | 6.297  | -7.297  |
|    | 9  | GQQQANE                   | -144.247 | -143.247 | 8.736  | -9.736  |
|    | 10 | QQQANEY                   | -127.463 | -126.463 | 11.464 | -12.464 |
|    | 11 | QQANEYG                   | -130.110 | -129.110 | 6.883  | -7.883  |
|    | 12 | QANEYGR                   | -119.700 | -118.700 | 8.554  | -9.554  |
|    | 13 | ANEYGRP                   | -136.798 | -135.798 | 7.993  | -8.993  |
|    | 14 | NEYGRPQ                   | -82.895  | -81.895  | 11.626 | -12.626 |
|    | 15 | EYGRPQQ                   | -122.905 | -121.905 | 12.291 | -13.291 |
|    | 16 | YGRPQQN                   | -91.233  | -90.233  | 9.204  | -10.204 |
|    | 17 | GRPQQNG                   | -145.851 | -144.851 | 6.652  | -7.652  |
|    | 18 | RPQQNGQ                   | -96.043  | -95.043  | 16.013 | -17.013 |

---



Each prion sequence was analyzed in windows of seven residues at a time. Each window was used as a peptide sequence binding the active pocket of Ydj1. The corresponding energy values computed using Medusa are shown in the table. S no., sequence number; W no., window number
